# Supplementary material for: A Two-Dimensional K-Shell X-ray Fluorescence (2D-KXRF) Model for Soft Tissue Attenuation Corrections of Strontium Measurements in a Cortical Lamb Bone Sample
Source: MDPI journal article supplement (doi:10.3390/metrology3040020), 2023-10-06
Supplement: s1 [file s1]

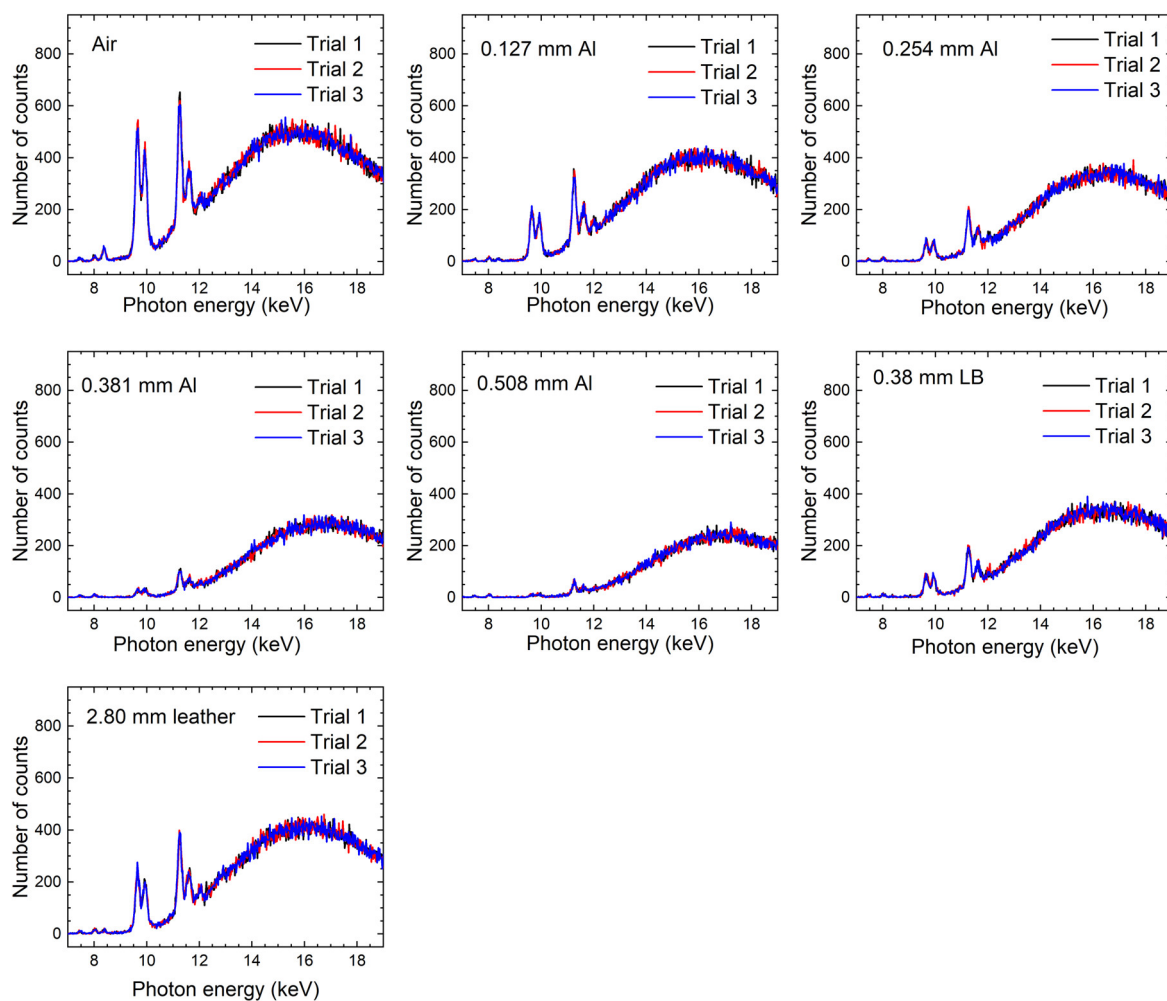

**Figure S1.** Three-trial X-ray spectra obtained in the X-ray attenuation measurements in the 8 keV to 18 keV photon energy range. Attenuated spectra from each sample can be visually compared to that of air provided in the upper-left corner.

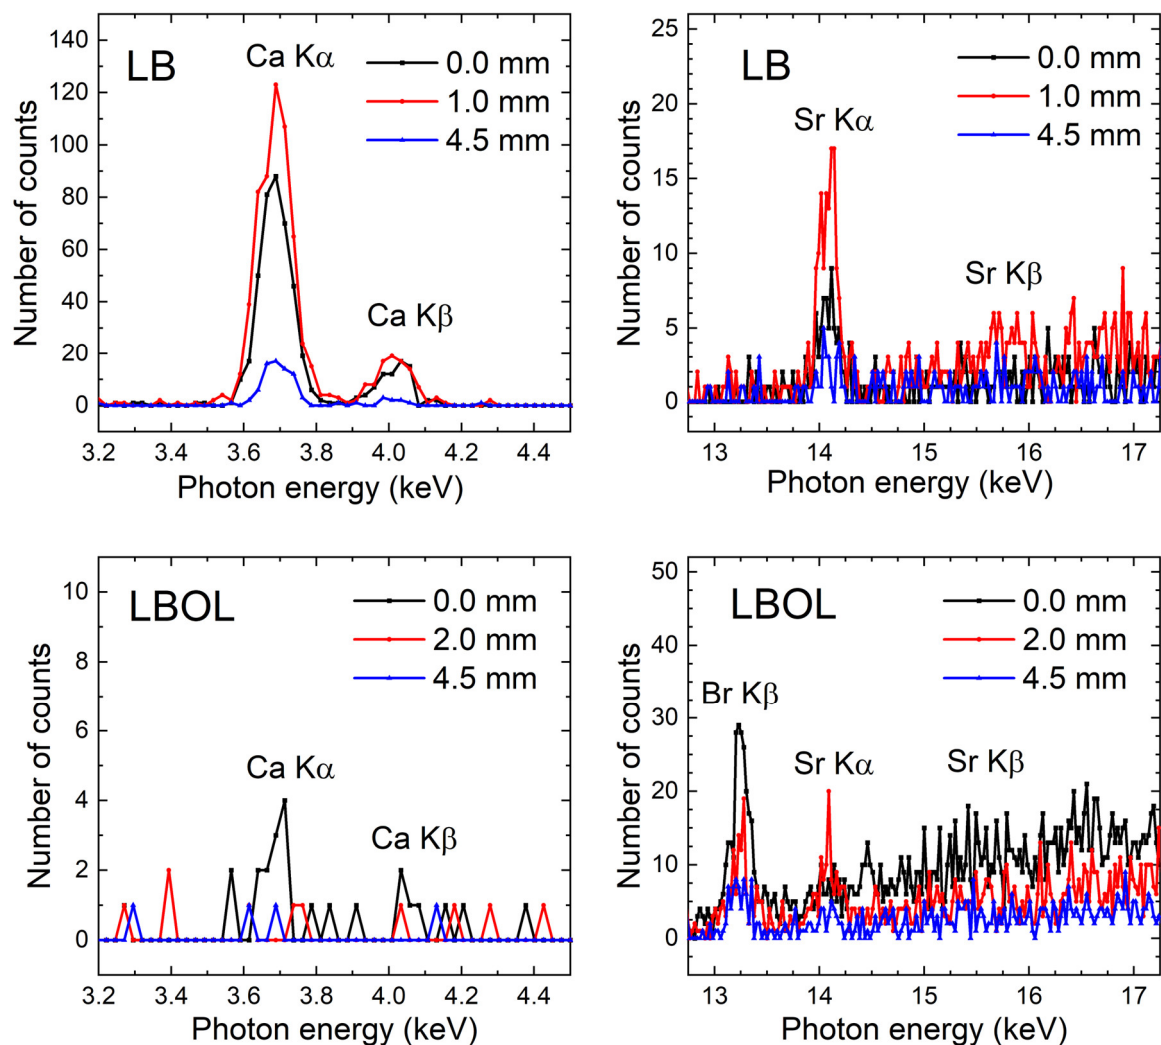

**Figure S2.** Sample plots of the X-ray spectra acquired in 10-second intervals at different positions of the lamb bone (LB) and lamb bone with overlying leather (LBOL) samples relative to the X-ray beam. Two separate photon energy intervals are shown focusing on Ca KXRF peaks (left) and Sr KXRF peaks (right).
